# Supplementary material for: Use of In-Game Rewards to Motivate Daily Self-Report Compliance: Randomized Controlled Trial
Source: PubMed Central journal article supplement (PMC6682282; doi:10.2196/11683), 2019-01-03
Supplement: jmir_v21i1e11683_app1.pdf [file jmir_v21i1e11683_app1.pdf]

# Supplemental Material

## Use of In-game Rewards to Motivate Daily Self-Report Compliance

Sara Taylor, MS, Massachusetts Institute of Technology, Cambridge, MA, USA  
Craig Ferguson, MS, Massachusetts Institute of Technology, Cambridge, MA, USA  
Fengjiao Peng, MS, Massachusetts Institute of Technology, Cambridge, MA, USA  
Magdalena Schoeneich, MBA, Takeda Pharmaceuticals, Cambridge, MA, USA  
Rosalind W Picard, ScD, Massachusetts Institute of Technology, Cambridge, MA, USA

Correspondence: Sara Taylor ([sataylor@media.mit.edu](mailto:sataylor@media.mit.edu))

Phone: 612-860-8622

Massachusetts Institute of Technology  
Media Lab, Affective Computing Group  
77 Massachusetts Ave, E14-348V  
Cambridge, MA 02142

## Daily Diary Questions

Below is the daily diary administered to participants. All participants received questions 1-6 and were required to choose a single best response. Question 7 was only given to participants in the Paper PRO group.

Before running the 35-day study, we conducted informational interviews with people aged 6-50 years old to determine if any of the questions or responses should be modified. We note that originally only four moods were used based on choosing one representative word from each quadrant of the circumplex model of emotion that would be understandable for a wide age range, namely Happy, Relaxed, Sad, and Angry. The interview participants suggested that we include Bored as one of the moods. Thus, we included five moods total. No other questions were modified.

- 1) **What was your mood during the last 24 hours? (Choose one)**  
Happy    Relaxed    Sad    Angry    Bored
- 2) **How many minutes did you spend playing mobile games in the last 24 hours? (Choose one)**  
0 minutes    1-15minutes    16-30minutes    31-60 minutes    61+ minutes
- 3) **How many times did you watch ads for in-game rewards in the past 24 hours? (Choose one)**  
0 times    1 time    2-5 times    5-10 times    more than 10 times
- 4) **How many minutes did you spend outside in the last 24 hours? (Choose one)**  
0 minutes    1-15minutes    16-30minutes    31-60 minutes    61+ minutes
- 5) **What has the weather been like in the last 24 hours? (Choose one)**  
Cold    Just Right    Hot
- 6) **What has the weather been like in the last 24 hours? (Choose one)**  
Sunny    Cloudy    Rainy    Snowy
- 7) **What is displayed on the webpage (<URL Redacted>) right now?**

## Participants Results

Table 1: 2-way ANOVA results to determine if average age is significantly different between study groups and completing the pre-study survey

|                                          | Df  | SumSq | MeanSq | F-value | P-value      |
|------------------------------------------|-----|-------|--------|---------|--------------|
| Study Group                              | 2   | 171   | 85.47  | 3.007   | <b>0.051</b> |
| Completed Pre-Study Survey               | 1   | 90    | 90.49  | 3.184   | <b>0.076</b> |
| Study Group * Completed Pre-Study Survey | 2   | 29    | 14.59  | 0.513   | 0.599        |
| Residuals                                | 226 | 6424  | 28.42  |         |              |

Table 2: Tukey Post Hoc Tests for average age displaying only the comparisons with  $P\text{-adj} < 0.1$

|                              | Mean Difference | Lower CI    | Upper CI   | P-adj |
|------------------------------|-----------------|-------------|------------|-------|
| Study Group                  |                 |             |            |       |
| Paper PRO - ePRO             | 2.06 years      | 0.03 years  | 4.09 years | 0.046 |
| Completed Pre-Study Survey   |                 |             |            |       |
| Completed – Did not complete | 1.73 years      | -0.20 years | 3.66 years | 0.078 |

## Game Engagement Results

Table 3: Pearson correlations between game engagement and the total number of daily diaries completed and age of the participant

|                               | Number of Daily Diaries Completed |                  | Age              |              |
|-------------------------------|-----------------------------------|------------------|------------------|--------------|
|                               | Pearson's $\rho$                  | P-value          | Pearson's $\rho$ | P-value      |
| Average Levels Purchased      | 0.5894                            | <b>&lt;0.001</b> | 0.1009           | 0.477        |
| Average Housing Changes       | 0.1992                            | 0.157            | 0.2939           | <b>0.034</b> |
| Percent Pets with Custom Name | 0.0803                            | 0.572            | -0.2396          | <b>0.087</b> |
| Average Number Pets with Item | 0.3145                            | <b>0.023</b>     | 0.0494           | 0.728        |

## Daily Diary Completion

Table 4: 3-way ANOVA results to determine if average completion rate is significantly different between study groups

|                                  | Df  | SumSq | MeanSq  | F-value | P-value      |
|----------------------------------|-----|-------|---------|---------|--------------|
| Study Group                      | 2   | 0.587 | 0.29356 | 6.341   | <b>0.002</b> |
| Age Group                        | 4   | 0.166 | 0.04144 | 0.895   | 0.469        |
| Gender                           | 1   | 0.000 | 0.00010 | 0.002   | 0.964        |
| Study Group * Age Group          | 8   | 0.937 | 0.11713 | 2.530   | <b>0.014</b> |
| Study Group * Gender             | 2   | 0.034 | 0.01692 | 0.366   | 0.695        |
| Age Group * Gender               | 4   | 0.209 | 0.05226 | 1.129   | 0.346        |
| Study Group * Age Group * Gender | 8   | 0.430 | 0.06137 | 1.326   | 0.244        |
| Residuals                        | 124 | 5.740 | 0.04629 |         |              |

Table 5: Tukey Post Hoc Tests for average completion rate displaying only the comparisons with  $P\text{-adj} < 0.1$

|  | Mean Difference | Lower CI | Upper CI | P-adj |
|--|-----------------|----------|----------|-------|
|--|-----------------|----------|----------|-------|

| Study Group             |                                             |       |       |       |       |
|-------------------------|---------------------------------------------|-------|-------|-------|-------|
|                         | Game-Motivated ePRO – Paper PRO             | 15.8% | 5.2%  | 26.4% | 0.002 |
|                         | Game-Motivated ePRO – ePRO                  | 8.7%  | 1.0%  | 18.4% | 0.089 |
| Study Group * Age Group |                                             |       |       |       |       |
|                         | 19-24 Game-Motivated ePRO - 19-24 Paper PRO | 28.2% | 4.3%  | 52.0% | 0.007 |
|                         | 19-24 ePRO – 19-24 Paper PRO                | 21.4% | -1.1% | 43.9% | 0.083 |
|                         | 19-24 Game-Motivated ePRO – 6-9 ePRO        | 33.9% | 3.8%  | 64.0% | 0.013 |
|                         | 13-15 Game-Motivated ePRO – 6-9 ePRO        | 36.8% | -2.4% | 76.0% | 0.092 |
|                         | 19-24 ePRO – 6-9 ePRO                       | 27.2% | -1.9% | 56.2% | 0.095 |

## Self-Report Response Distributions

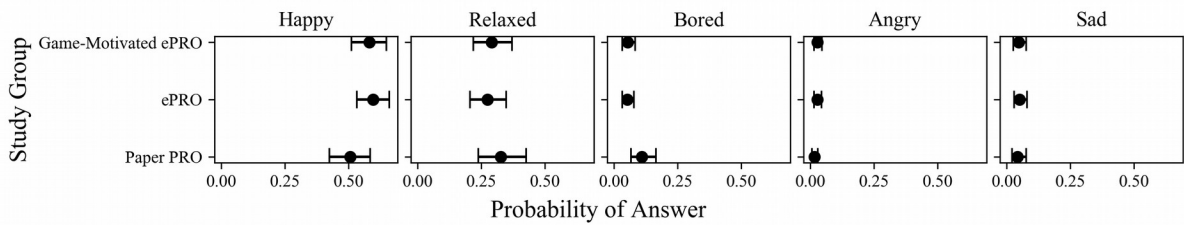

Figure 1: Probability and 95% credibility intervals of each response for the mood question by study group

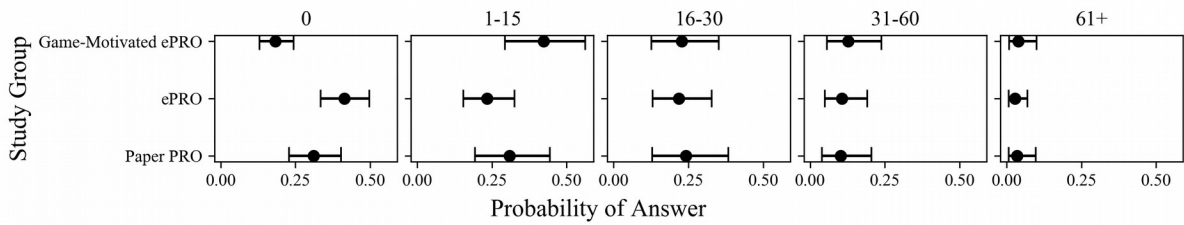

Figure 2: Probability and 95% credibility intervals of each response for the game duration question by study group

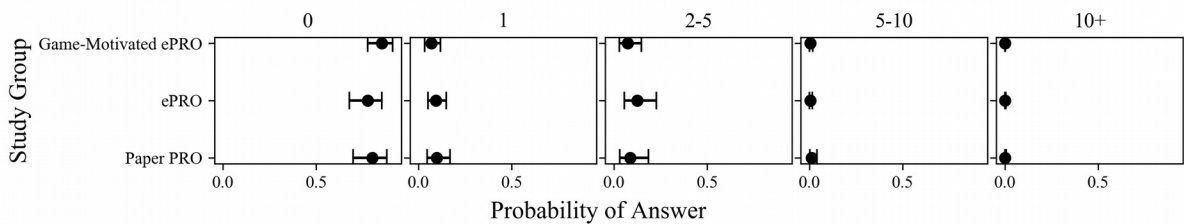

Figure 3: Probability and 95% credibility intervals of each response for the number of ads watched question by study group

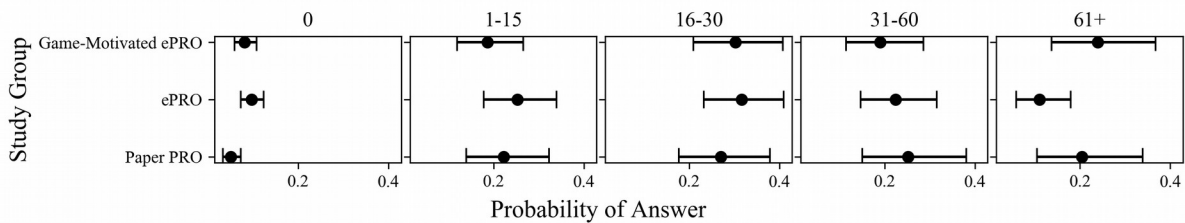

Figure 4: Probability and 95% credibility intervals of each response for the outside duration question by study group

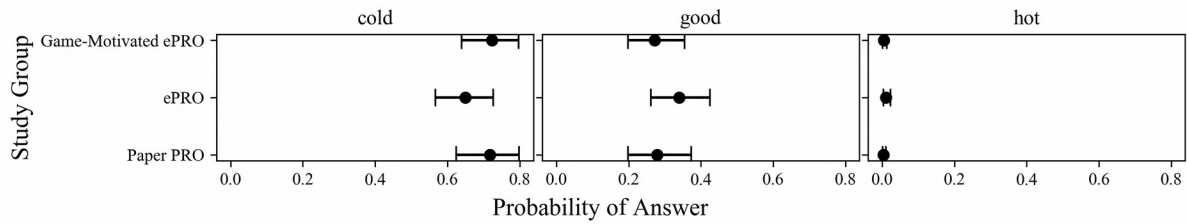

Figure 5: Probability and 95% credibility intervals of each response for the weather temperature question by study group

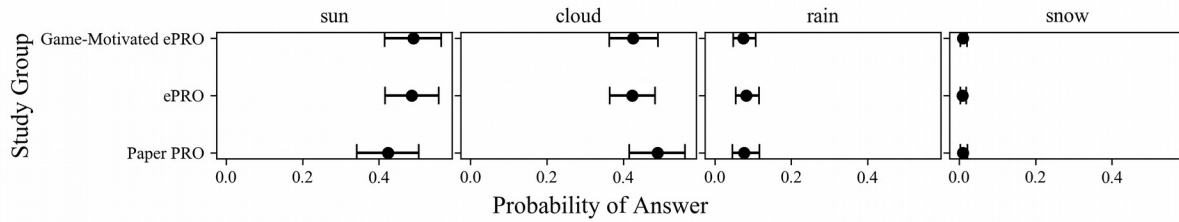

Figure 6: Probability and 95% credibility intervals of each response for the weather precipitation question by study group

## Average Duration of Daily Diary

Table 6: 3-way ANOVA results to determine if average duration is significantly different between study groups

|                                  | Df | SumSq, s | MeanSq, s | F-value | P-value      |
|----------------------------------|----|----------|-----------|---------|--------------|
| Study Group                      | 1  | 233      | 232.7     | 0.423   | 0.517        |
| Age Group                        | 4  | 8153     | 2038.2    | 3.705   | <b>0.008</b> |
| Gender                           | 1  | 2341     | 2341.5    | 4.256   | <b>0.042</b> |
| Study Group * Age Group          | 4  | 7583     | 1895.8    | 3.446   | <b>0.011</b> |
| Study Group * Gender             | 1  | 2972     | 2971.8    | 5.402   | <b>0.022</b> |
| Age Group * Gender               | 4  | 6160     | 1539.9    | 2.799   | <b>0.031</b> |
| Study Group * Age Group * Gender | 4  | 2881     | 720.3     | 1.309   | 0.273        |
| Residuals                        | 91 | 50065    | 550.2     |         |              |

Table 7: Tukey Post Hoc Tests for average duration displaying only the comparisons with  $P\text{-adj} < 0.1$

|                                                       | Mean Diff, s | Lower CI, s | Upper CI, s | P-adj |
|-------------------------------------------------------|--------------|-------------|-------------|-------|
| <b>Age Group</b>                                      |              |             |             |       |
| 19-24 years old – 16-18 years old                     | 20.5         | 3.1         | 37.9        | 0.012 |
| 19-24 years old – 10-12 years old                     | 18.0         | -1.5        | 37.6        | 0.086 |
| <b>Gender</b>                                         |              |             |             |       |
| Males – Females                                       | 9.1          | 0.2         | 18.0        | 0.044 |
| <b>Study Group * Age Group</b>                        |              |             |             |       |
| 19-24 ePRO – 16-18 Game-Motivated ePRO                | 30.3         | 4.7         | 55.9        | 0.008 |
| 19-24 ePRO – 10-12 ePRO                               | 37.4         | 4.7         | 70.1        | 0.012 |
| 19-24 Game-Motivated ePRO – 16-18 Game-Motivated ePRO | 27.4         | 0.6         | 54.2        | 0.040 |
| 19-24 Game-Motivated ePRO – 10-12 ePRO                | 34.5         | 0.9         | 68.1        | 0.039 |
| <b>Study Group * Gender</b>                           |              |             |             |       |
| Male Game-Motivated ePRO – Female Game-Motivated ePRO | 20.4         | -3.0        | 37.7        | 0.014 |
| <b>Age Group * Gender</b>                             |              |             |             |       |

|                               |      |      |      |        |
|-------------------------------|------|------|------|--------|
| Males 19-24 – Females 16-18   | 39.0 | 11.3 | 55.7 | <0.001 |
| Females 19-24 – Females 16-18 | 35.9 | 7.0  | 64.7 | 0.004  |
| Males 16-18 – Females 16-18   | 36.0 | 2.7  | 69.3 | 0.023  |
| Males 13-15 – Females 16-18   | 32.9 | -1.2 | 67.1 | 0.069  |

## System Usability Scale Scores

Table 8: 3-way ANOVA results to determine if SUS score is significantly different between study groups

|                                  | Df | SumSq | MeanSq | F-value | P-value      |
|----------------------------------|----|-------|--------|---------|--------------|
| Study Group                      | 1  | 4     | 3.7    | 0.024   | 0.877        |
| Age Group                        | 4  | 1370  | 342.5  | 2.221   | <b>0.073</b> |
| Gender                           | 1  | 755   | 755.3  | 4.898   | <b>0.030</b> |
| Study Group * Age Group          | 4  | 1974  | 493.4  | 3.200   | <b>0.017</b> |
| Study Group * Gender             | 1  | 617   | 616.7  | 3.999   | <b>0.049</b> |
| Age Group * Gender               | 4  | 95    | 23.8   | 0.154   | 0.961        |
| Study Group * Age Group * Gender | 4  | 1403  | 350.8  | 2.275   | <b>0.068</b> |
| Residuals                        | 88 | 13570 | 154.2  |         |              |

Table 9: Tukey Post Hoc Tests for SUS score displaying only the comparisons with P-adj<0.1

|                                         | Mean Diff | Lower CI | Upper CI | P-adj |
|-----------------------------------------|-----------|----------|----------|-------|
| <b>Age Group</b>                        |           |          |          |       |
| 19-24 years old – 6-9 years old         | 10.2      | -1.0     | 21.5     | 0.094 |
| <b>Gender</b>                           |           |          |          |       |
| Female – Male                           | 5.2       | 0.5      | 10.0     | 0.032 |
| <b>Study Group * Age Group</b>          |           |          |          |       |
| 19-24 ePRO – 6-9 ePRO                   | 20.5      | 3.1      | 37.8     | 0.008 |
| 19-24 Game-Motivated ePRO – 6-9 ePRO    | 19.0      | 1.1      | 36.8     | 0.028 |
| 6-9 Game-Motivated ePRO – 6-9 ePRO      | 22.9      | 0.7      | 46.5     | 0.065 |
| <b>Study Group * Gender</b>             |           |          |          |       |
| Female ePRO – Male ePRO                 | 9.7       | 1.0      | 18.3     | 0.022 |
| <b>Study Group * Age Group * Gender</b> |           |          |          |       |
| Female 19-24 ePRO – Male 6-9 ePRO       | 28.9      | 2.6      | 54.9     | 0.017 |
| Female 19-24 ePRO – Male 16-18 ePRO     | 45.0      | -2.2     | 92.2     | 0.081 |
